# Supplementary material for: The synthesis of zeolitic imidazolate framework/prussian blue analogue heterostructure composites and their application in supercapacitors
Source: Royal Society of Chemistry journal article supplement (doi:10.1039/d2qi01966c), 2022-11-22
Supplement: d2qi01966c1.pdf [file d2qi01966c1.pdf]

## Supplementary Information

# The Synthesis of Zeolitic Imidazolate Frameworks/Prussian Blue Analogues Heterostructure Composites and Their Application in Supercapacitors

Xinyue Wu,<sup>a</sup> Qingling Jing,<sup>a</sup> Fancheng Sun,<sup>a,b</sup> Huan Pang<sup>\*a</sup>

<sup>a</sup> School of Chemistry and Chemical Engineering, Yangzhou University, Yangzhou, 225009, Jiangsu, P. R. China.

<sup>b</sup> Interdisciplinary Materials Research Center, Institute for Advanced Study, Chengdu University, Chengdu, 610106, Sichuan, P.R. China.

\*Corresponding authors: huanpangchem@hotmail.com; panghuan@yzu.edu.cn

## **1. Experimental section**

### **1.1. Synthesis of ZIF-67@PBA nanoparticles**

Typically,  $\text{Co}(\text{NO}_3)_2 \cdot 6\text{H}_2\text{O}$  (0.58 g), and 2-methylimidazole (0.65 g) were dissolved in 20 mL of methanol, respectively. The methanolic solution of  $\text{Co}(\text{NO}_3)_2$  was quickly injected into the solution of 2-methylimidazole at room temperature. After reacting for 20 minutes, the product ZIF-67 was collected by centrifugation and washed by methanol. 20 mg  $\text{K}_3[\text{Fe}(\text{CN})_6]$  and 40 mg ZIF-67 were dispersed into ethanol and water mixed solvent with stirring for 4 h at room temperature. The volume ratio of ethanol and water in the mixed solvent was 9:1, 1:1, 1:2, corresponding to the products ZP1, ZP2, ZP3.

To modulate its microstructure, we calcined ZP composites at different target temperatures (150, 250, 350 °C under  $\text{N}_2$  atmosphere for 2 h, obtaining ZP-X (X denoted temperature)).

### **1.2 Electrochemical measurements**

The electrochemical measurements were carried out with CHI760e working station in 3.0 M KOH solution at room temperature. Galvanostatic charge-discharge (GCD), Cyclic voltammetry (CV) and electrochemical impedance spectroscopy (EIS) were used to evaluate the capacitive properties of the ZIF-67@PBAs. The EIS measurements were conducted in the frequency range of 100 kHz to 0.01 Hz at the open circuit voltage.

For the three-electrode cell, the working electrodes were fabricated by mixing the active materials MOF, acetylene black, and polytetrafluoroethylene in a mass ratio of 80 : 15 : 5. The mixture was ground adequately to form a slurry and coated on nickel foam ( $\approx 1 \text{ cm}^2$ ), then pressed into a thin foil at a pressure of 10 MPa. A platinum electrode and a Hg/HgO electrode were served as the counter and reference electrode, respectively.

For the hybrid supercapacitor cells, the electrochemical measurements were conducted in a two-electrode electrochemical cell with MOF materials as positive electrode and activated carbon (AC) as negative electrode in 3.0 M KOH solution at room temperature. The positive electrode and negative electrode were fabricated by mixing the as-prepared MOF/activated carbon, acetylene black and polytetrafluoroethylene at a weight ratio of 80: 15: 5. The mixture was ground

adequately to form a slurry and coated on nickel foam ( $\approx 1 \text{ cm}^2$ ), then pressed into a thin foil at a pressure of 10 MPa.

### 1.3 Calculation

The specific capacitance of the electrode material can be calculated from the charge-discharge curves according to the equation:

$$C = Q / (m \times \Delta V) = \int I dt / (m \times \Delta V) = I \times t_{\text{discharge}} / (m \times \Delta V)$$

Where C is specific capacitance in  $\text{F g}^{-1}$ ,  $t_{\text{discharge}}$  is the discharging time in s,  $\Delta V$  is the potential window in V.

Table S1 Comparisons of other ZIF-based materials for SCs Sample

| Sample                 | Electrolyte                            | Scan rate<br>(mV s <sup>-1</sup> ) | Current density<br>(A g <sup>-1</sup> ) | Capacitance<br>(F g <sup>-1</sup> ) | Ref.      |
|------------------------|----------------------------------------|------------------------------------|-----------------------------------------|-------------------------------------|-----------|
| ZIF-67/PEDOT composite | PVA/1 M H <sub>2</sub> SO <sub>4</sub> |                                    | 1.0                                     | 106.8                               | 1         |
| ZIF-67/GO-2 composite  | 6 M KOH                                | 0.5                                |                                         | 100.4                               | 2         |
| P-ZIF-67               | 6 M KOH                                |                                    | 1.0                                     | 120.0                               | 3         |
| ZIF-67 microflowers    | 1 M KOH                                |                                    | 1.0                                     | 188.7                               | 4         |
| ZP2-250                | 3 M KOH                                |                                    | 0.5                                     | 190.7                               | This work |

Table S2 The BET properties of the ZP2-X composites

| Sample  | $S_{\text{BET}}$ [m <sup>2</sup> /g] | $V_{\text{micro}}$ [cm <sup>3</sup> /g] |
|---------|--------------------------------------|-----------------------------------------|
| ZP2     | 511.444                              | 0.250                                   |
| ZP2-150 | 676.417                              | 0.313                                   |
| ZP2-250 | 835.843                              | 0.395                                   |
| ZP2-350 | 627.057                              | 0.303                                   |

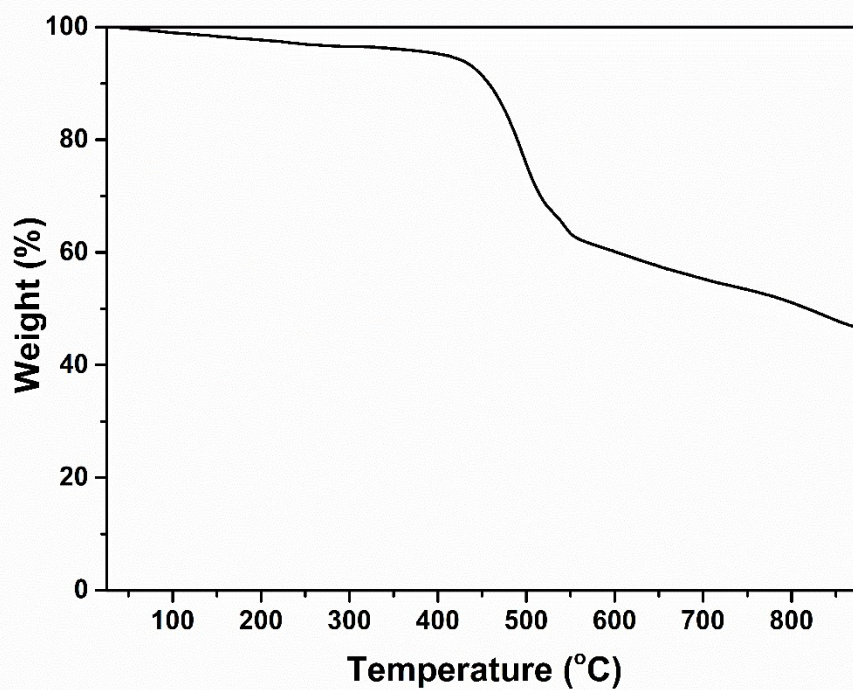

Figure S1 TGA curves of the ZP2 composites under N<sub>2</sub> atmosphere.

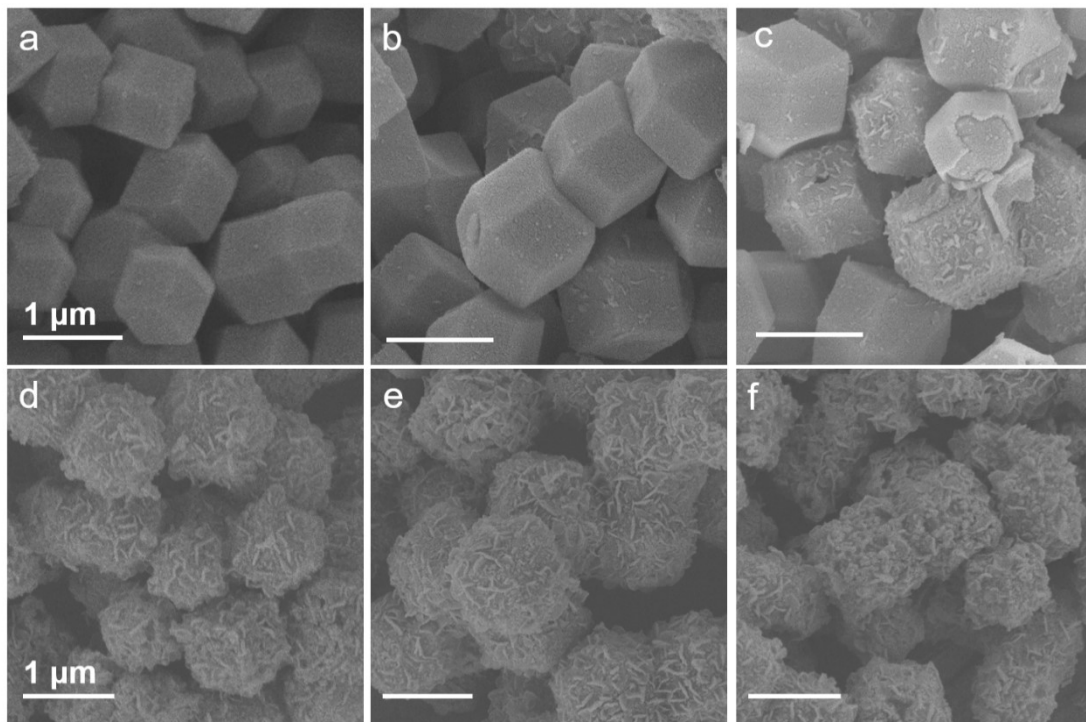

Figure S2 The SEM images of ZP1-150, ZP1-250, ZP1-350, ZP3-150, ZP3-250, ZP3-350 composites.

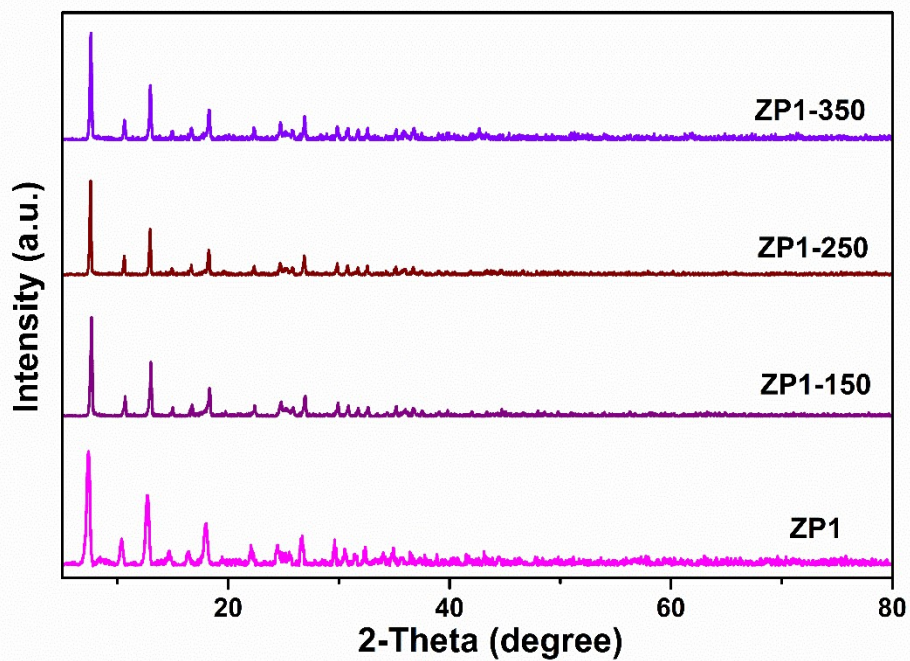

Figure S3 XRD patterns of the ZP1, ZP1-150, ZP1-250, ZP1-350 composites.

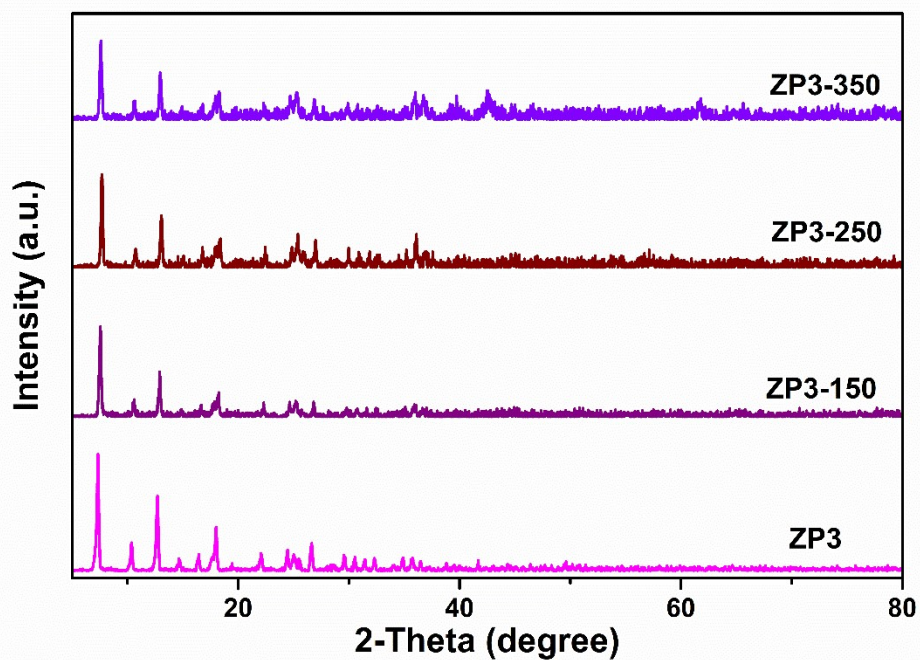

Figure S4 XRD patterns of the ZP3, ZP3-150, ZP3-250, ZP3-350 composites.



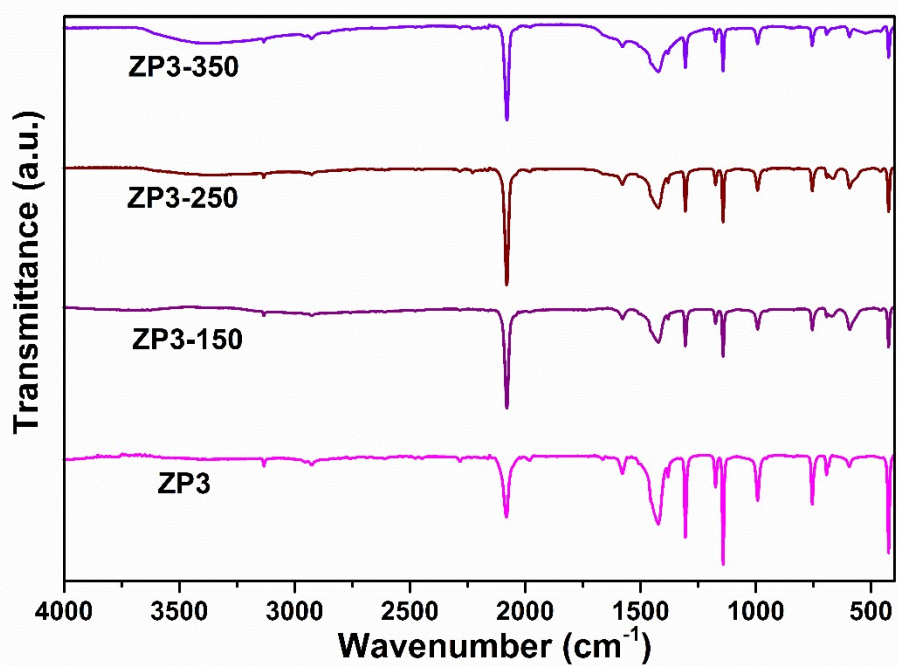

Figure S5 FT-IR spectra of the ZP1, ZP1-150, ZP1-250, ZP1-350 composites.

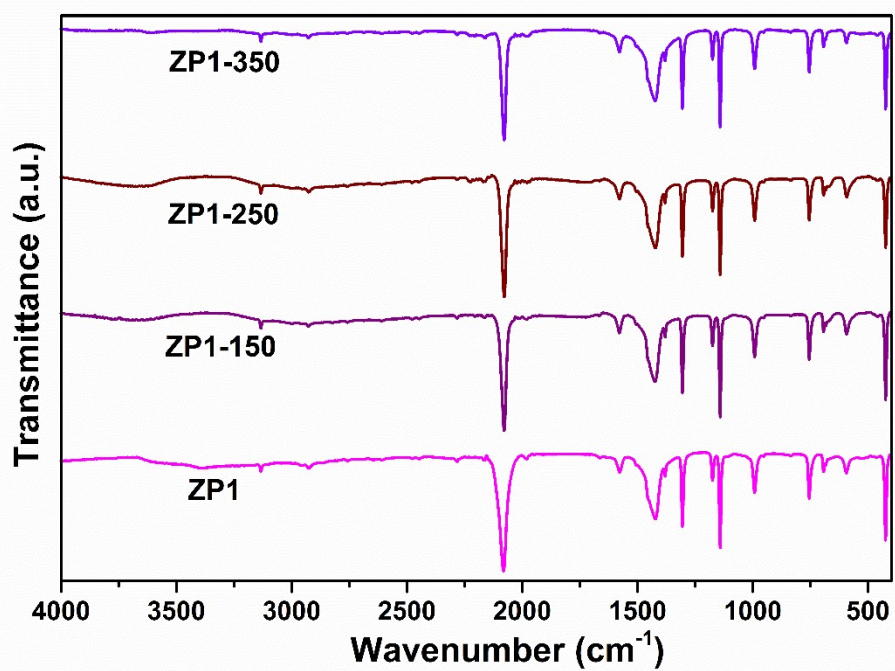

Figure S6 FT-IR spectra of the ZP3, ZP3-150, ZP3-250, ZP3-350 composites.

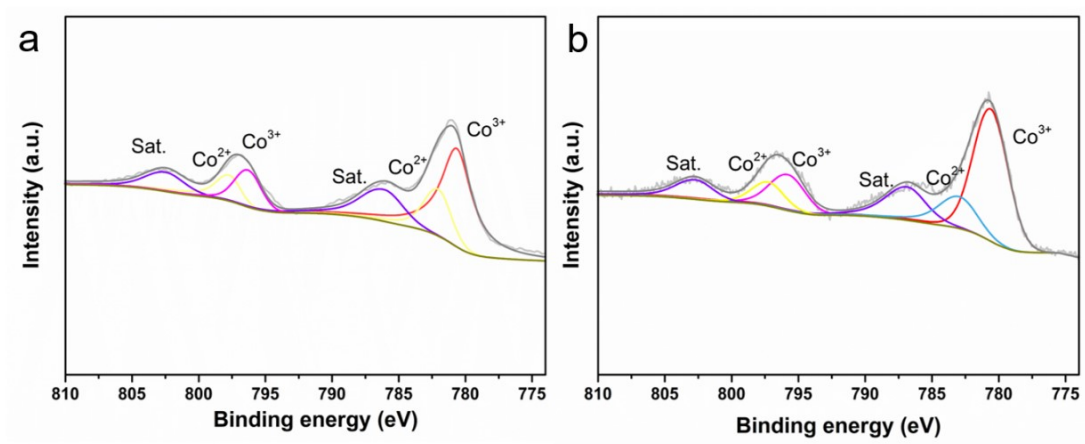

Figure S7 High-resolution Co 2p XPS spectra of (a) ZP2-150, (b) ZP2-350 composites.

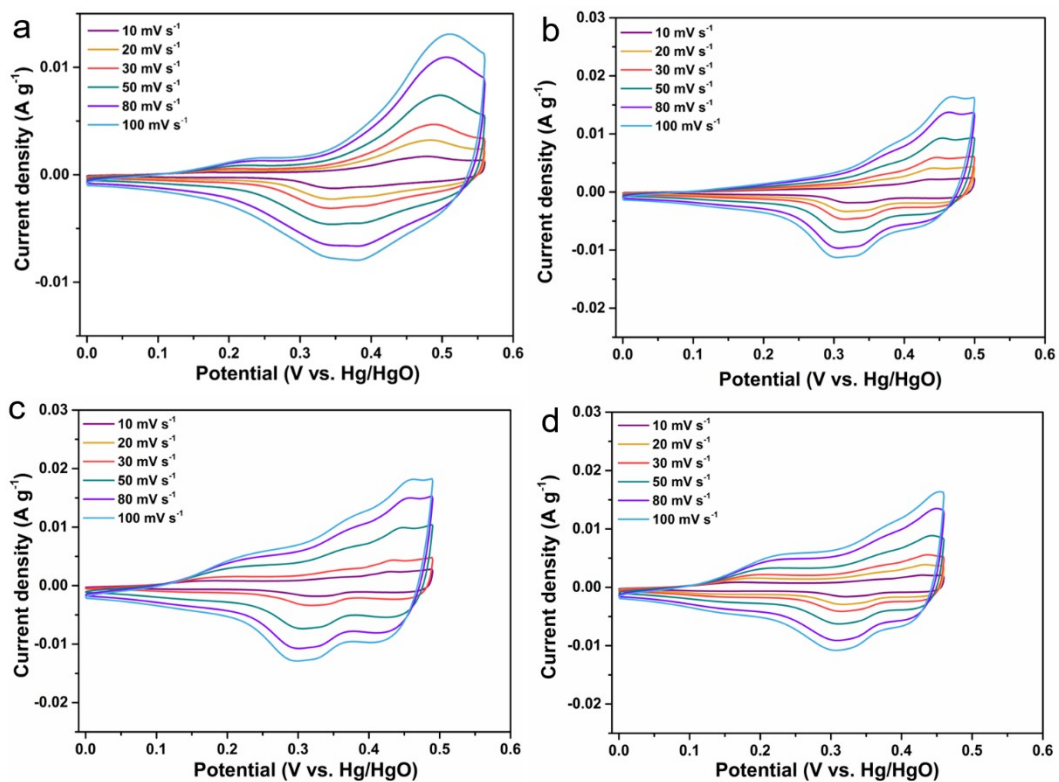

Figure S8 The electrochemical performance of the (a) ZP1, (b) ZP1-150, (c) ZP1-250, (d) ZP1-350 in a three-electrode cell: the CV curves at different current densities.

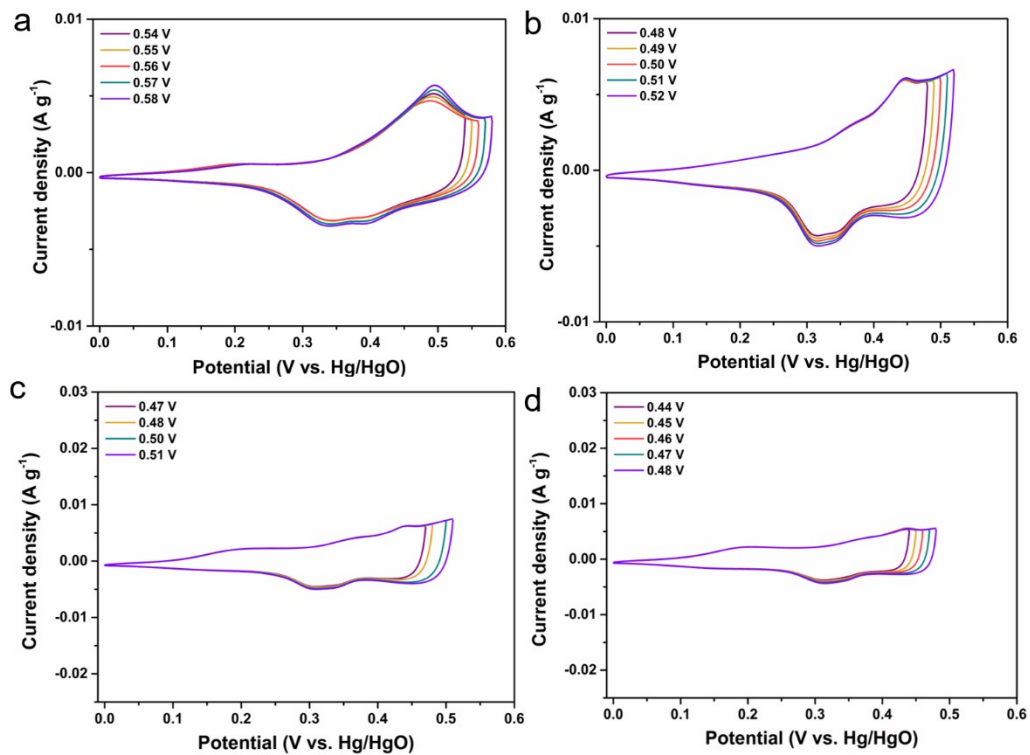

Figure S9 The electrochemical performance of the (a) ZP1, (b) ZP1-150, (c) ZP1-250, (d) ZP1-350 in a three-electrode cell: the CV curves with a scan rate at  $30 \text{ mV s}^{-1}$  at different potentials.

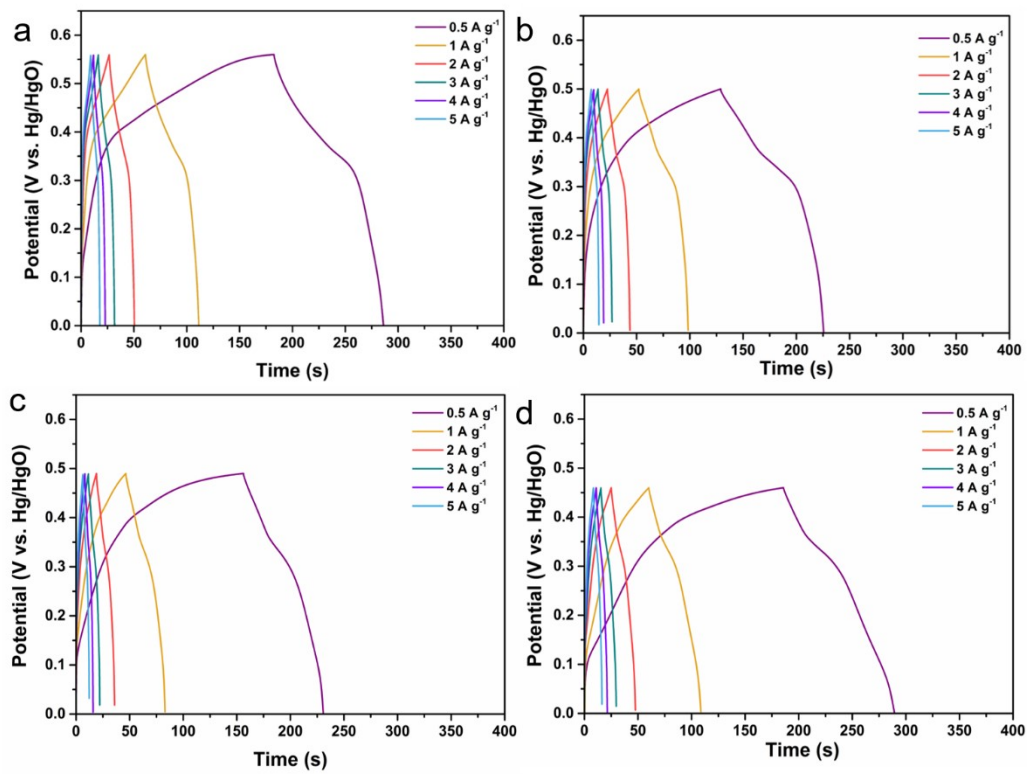

Figure S10 The electrochemical performance of the (a) ZP1, (b) ZP1-150, (c) ZP1-250, (d) ZP1-350 in a three-electrode cell: the GCD curves at different current densities.

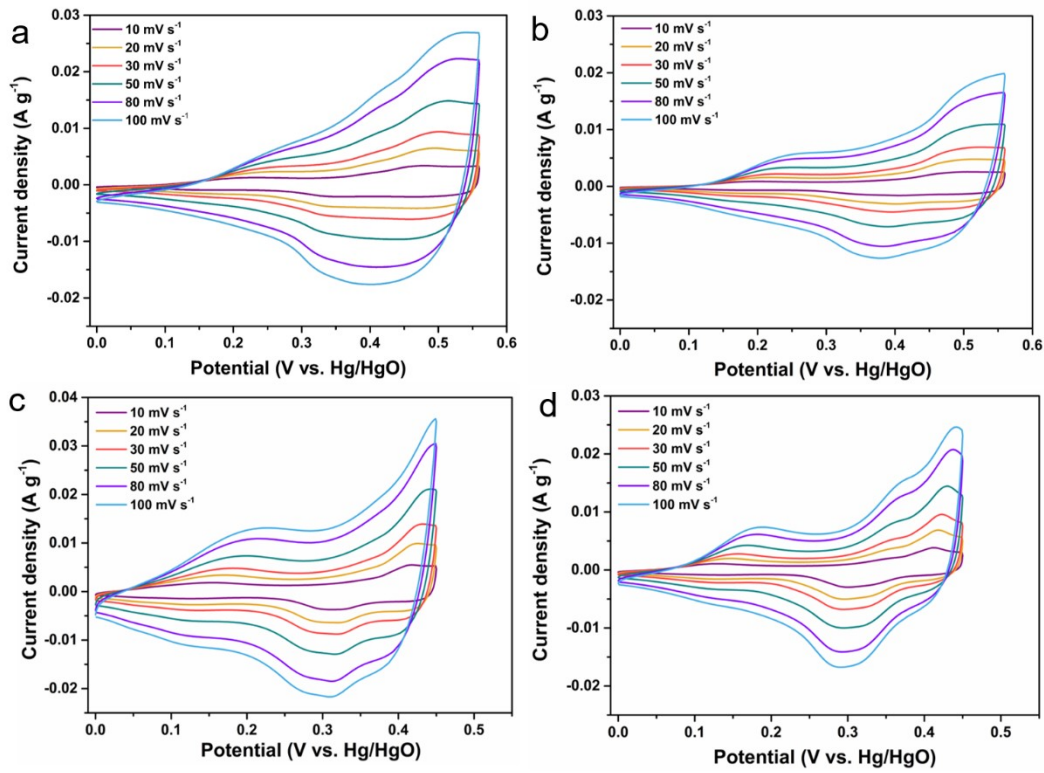

Figure S11 The electrochemical performance of the (a) ZP2, (b) ZP2-150, (c) ZP2-250, (d) ZP2-350 in a three-electrode cell: the CV curves at different current densities.

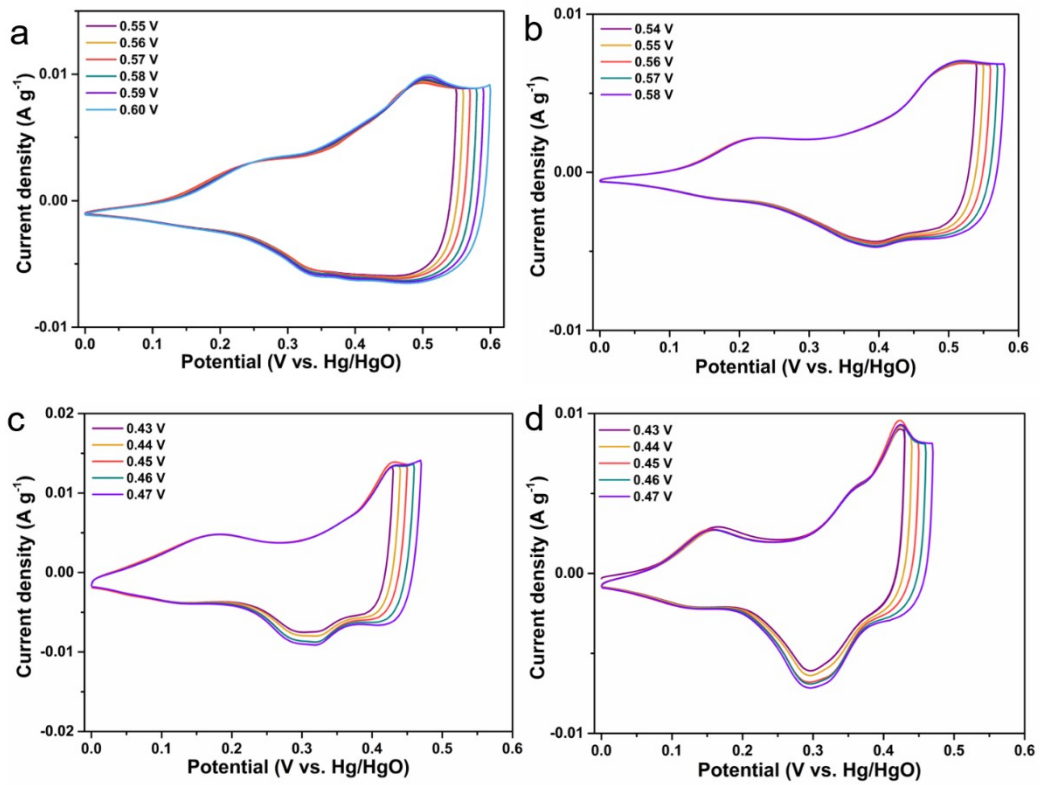

Figure S12 The electrochemical performance of the (a) ZP2, (b) ZP2-150, (c) ZP2-250, (d) ZP2-350 in a three-electrode cell: the CV curves with a scan rate at 30 mV s<sup>-1</sup> at different potentials.



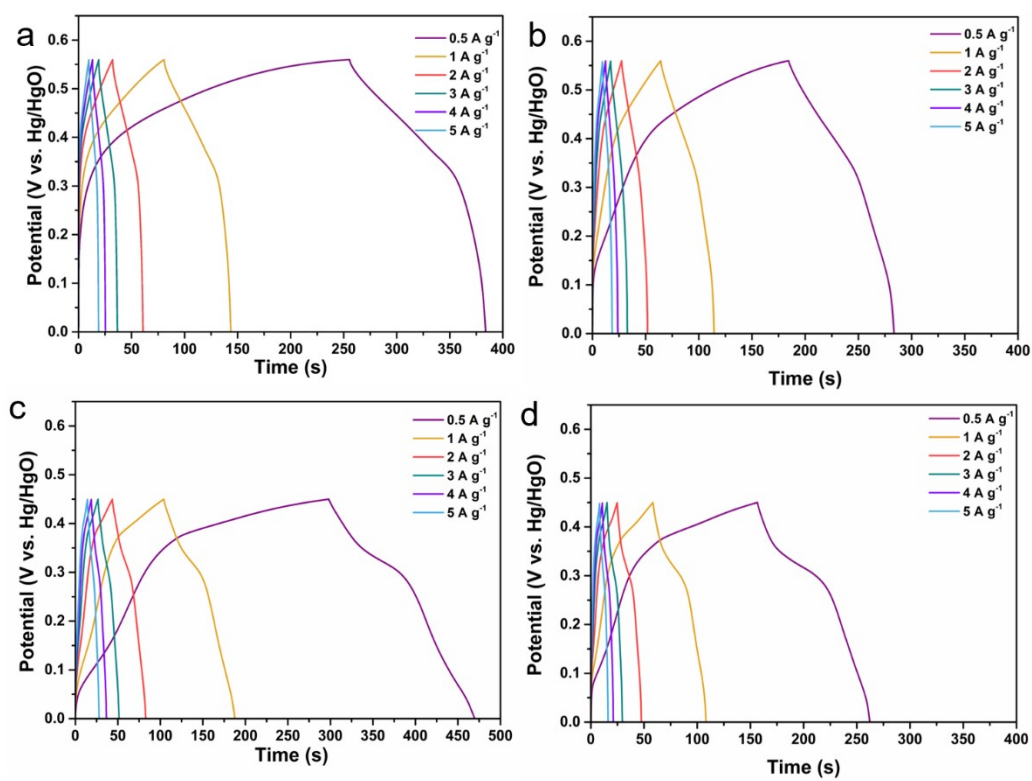

Figure S13 The electrochemical performance of the (a) ZP2, (b) ZP2-150, (c) ZP2-250, (d) ZP2-350 in a three-electrode cell: the GCD curves at different current densities.



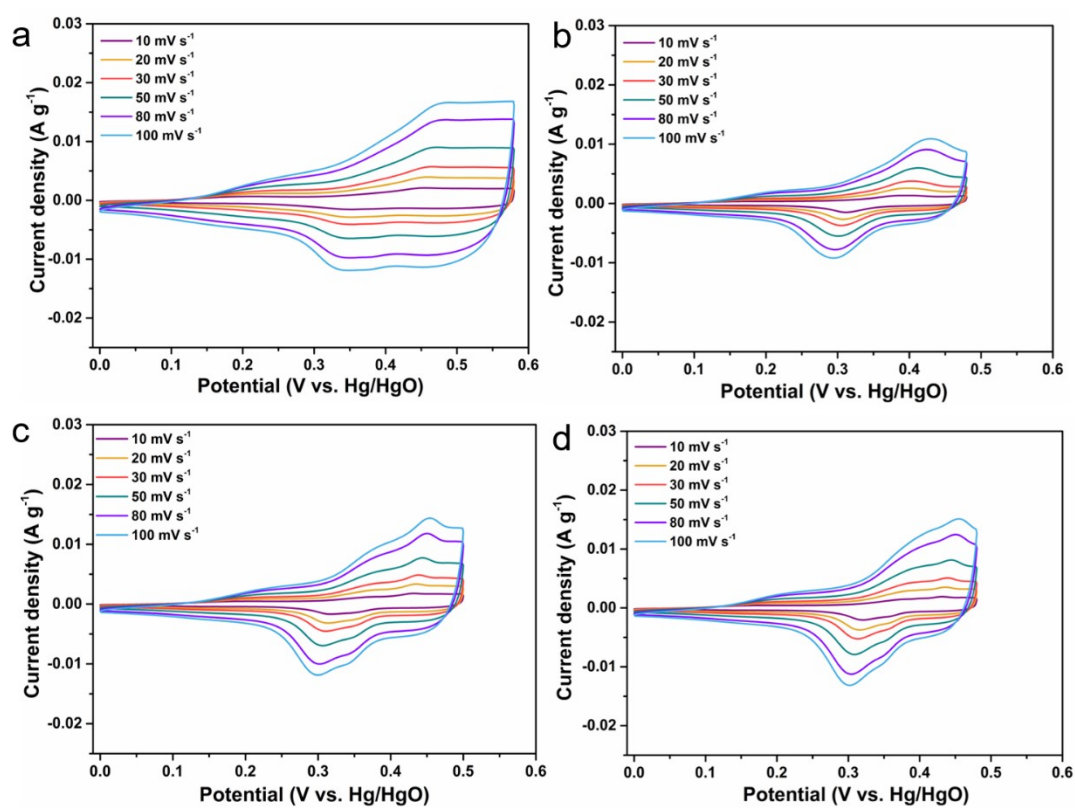

Figure S14 The electrochemical performance of the (a) ZP3, (b) ZP3-150, (c) ZP3-250, (d) ZP3-350 in a three-electrode cell: the CV curves at different current densities.

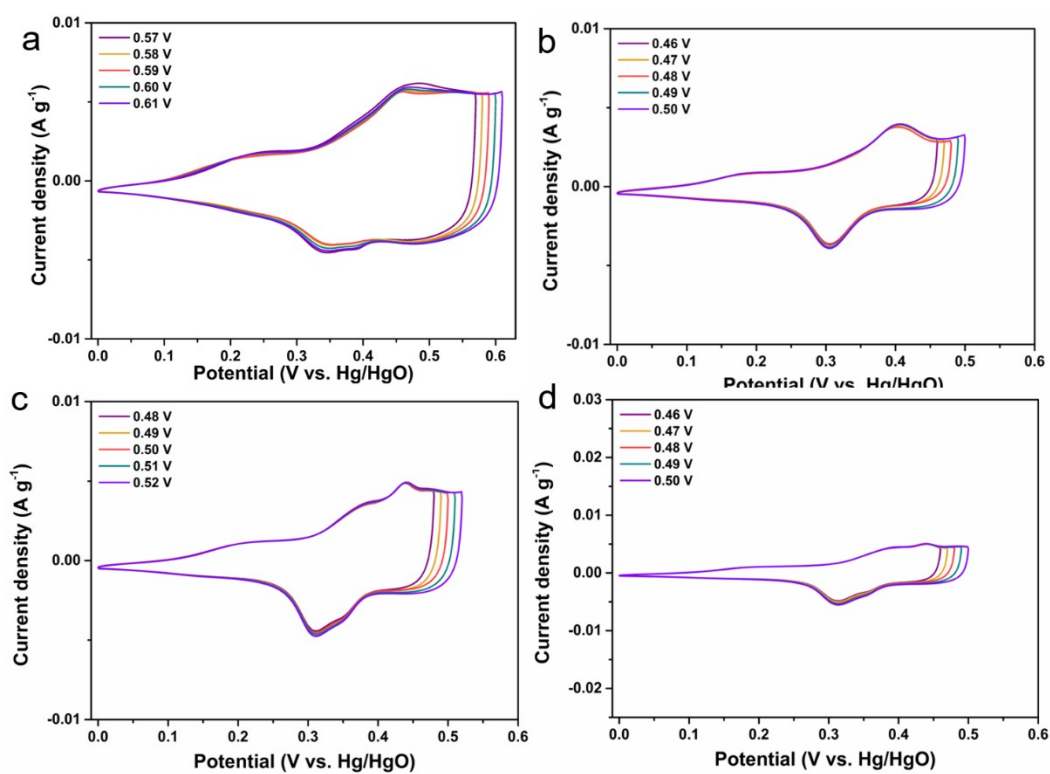

Figure S15 The electrochemical performance of the (a) ZP3, (b) ZP3-150, (c) ZP3-250, (d) ZP3-350 in a three-electrode cell: the CV curves with a scan rate at 30 mV s<sup>-1</sup> at different potentials.

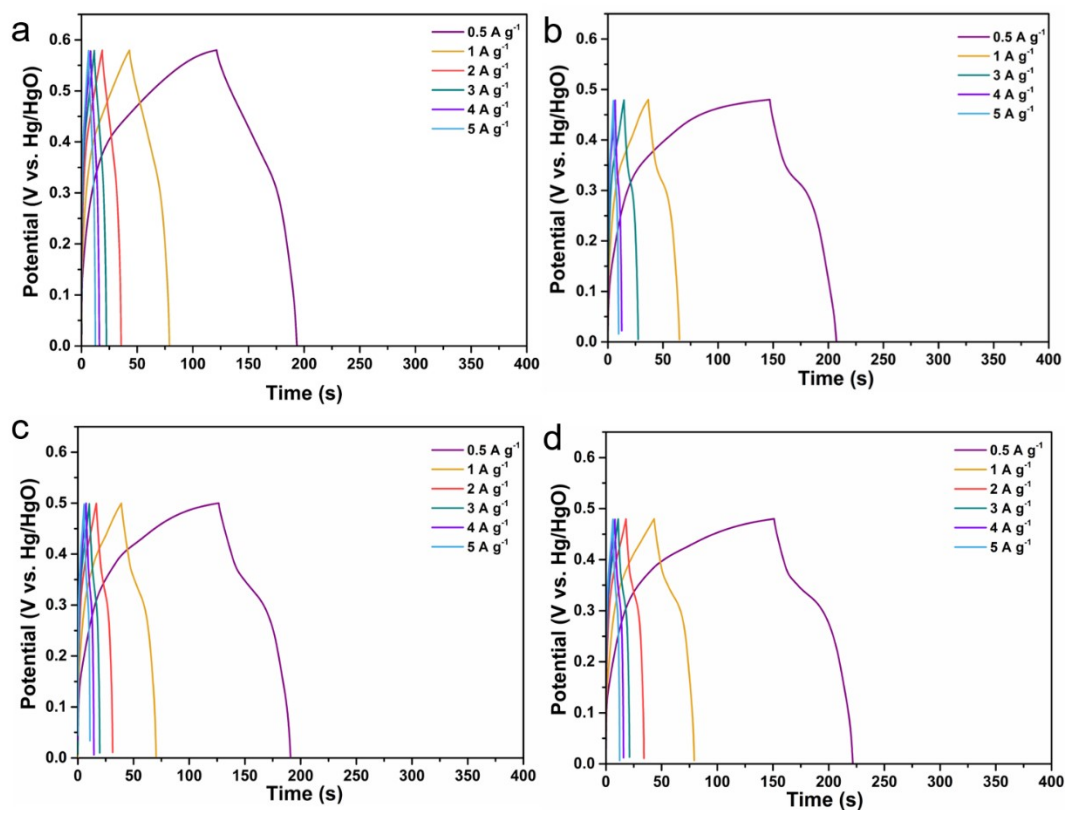

Figure S16 The electrochemical performance of the (a) ZP3, (b) ZP3-150, (c) ZP3-250, (d) ZP3-350 in a three-electrode cell: the GCD curves at different current densities.

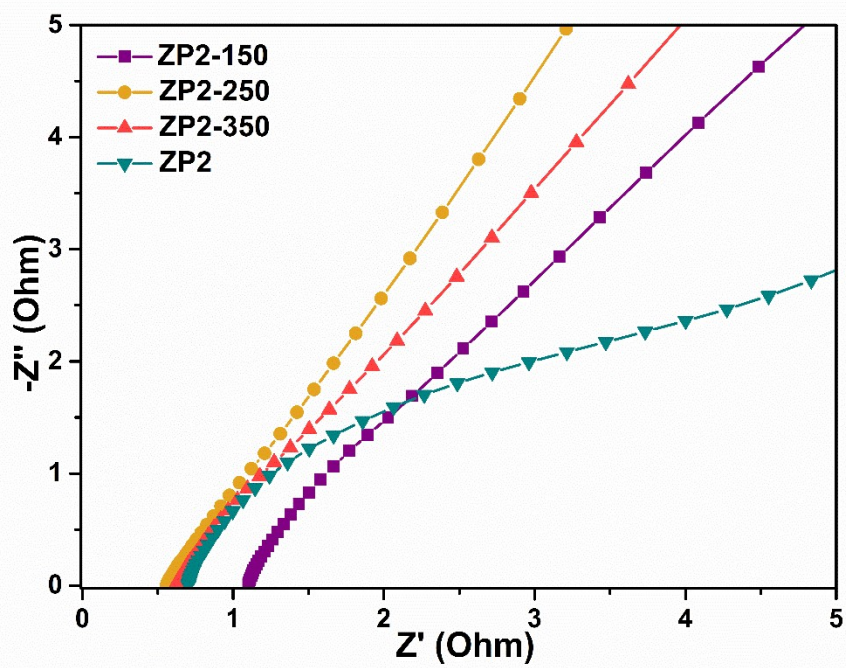

Figure S17 The EIS of the ZP2, ZP2-150, ZP2-250, ZP2-350 composites in three-electrode system.

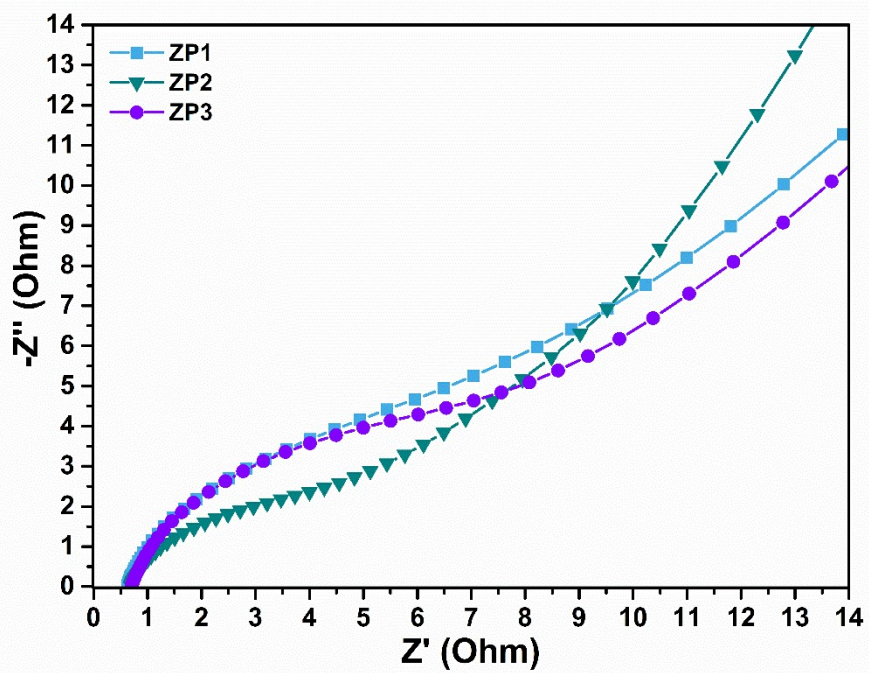

Figure S18 The EIS of the ZP1, ZP2, ZP3 composites in three-electrode system.

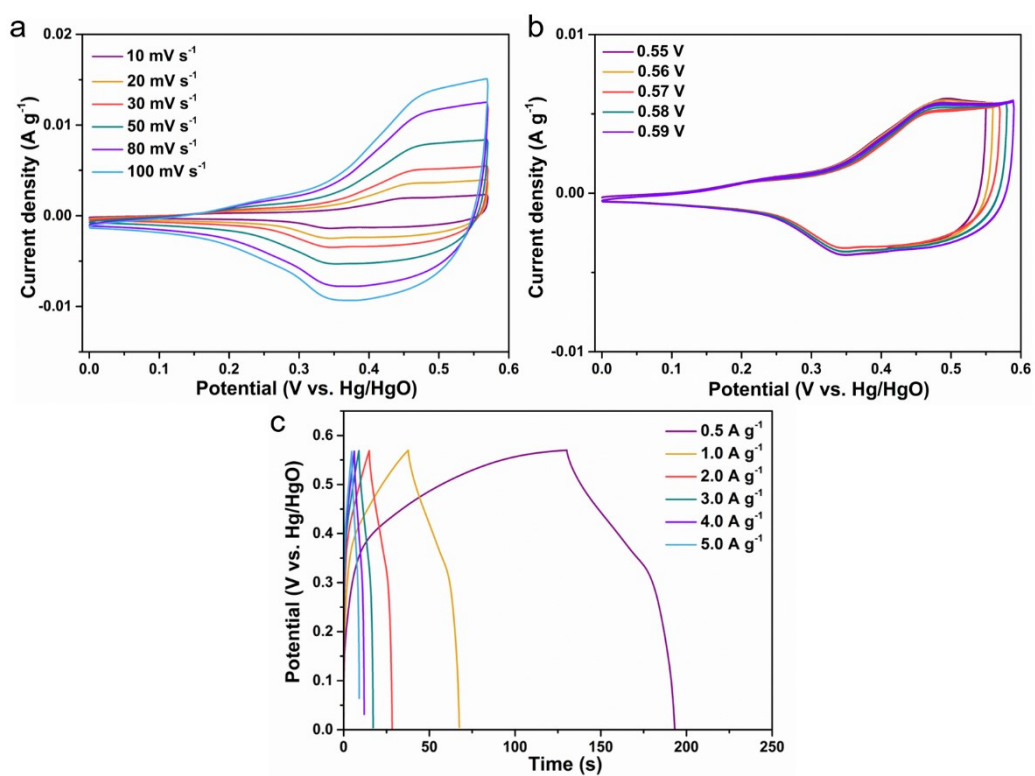

Figure S19 The electrochemical performance of the ZIF-67 :(a) the CV curves at different current densities; (b) the CV curves with a scan rate at 30 mV s<sup>-1</sup> at different potentials; (c) the GCD curves at different current densities.

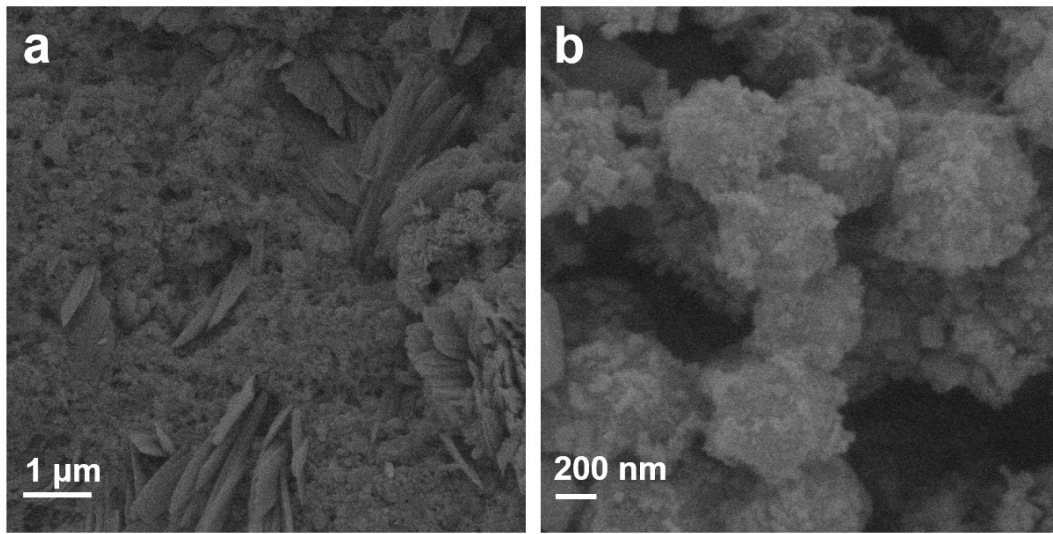

Figure S20 The SEM images of ZP2-250 electrode after long cycles.

## Reference

- 1 V. Shrivastav, S. Sundriyal, A. Kaur, U. K. Tiwari, S. Mishra and A. Deep, Conductive and Porous ZIF-67/PEDOT Hybrid Composite as Superior Electrode for All-Solid-State Symmetrical Supercapacitors. *J. Alloys Compd.*, 2020, **843**, 155992.
- 2 W. Cao, M. Han, L. Qin, Q. Jiang, J. Xu, Z. Lu and Y. Wang, Synthesis of Zeolitic Imidazolate Framework-67 Nanocube Wrapped by Graphene Oxide and Its Application for Supercapacitors. *J. Solid State Electrochem.*, 2019, **23**, 325–334.
- 3 Z. Ma, J. Li, R. Ma, J. He, X. Song, Y. Yu, Y. Quan and G. Wang, The Methodologically Obtained Derivative of ZIF-67 Metal-Organic Frameworks Present Impressive Supercapacitor Performance. *New J. Chem.*, 2022, **46**, 7230–7241.
- 4 D. Zhang, H. Shi, R. Zhang, Z. Zhang, N. Wang, J. Li, B. Yuan, H. Bai and J. Zhang, Quick Synthesis of Zeolitic Imidazolate Framework Microflowers with Enhanced Supercapacitor and Electrocatalytic Performances. *RSC Adv.*, 2015, **5**, 58772–58776.
